# Supplementary material for: Preparation and characterization of novel spica-like hierarchical vaterite calcium carbonate and a hydrophilic poly(vinylidene fluoride)/calcium carbonate composite membrane
Source: Royal Society of Chemistry journal article supplement (doi:10.1039/c4ce00171k), 2014-01-01
Supplement: c4ce00171k1.pdf [file c4ce00171k1.pdf]

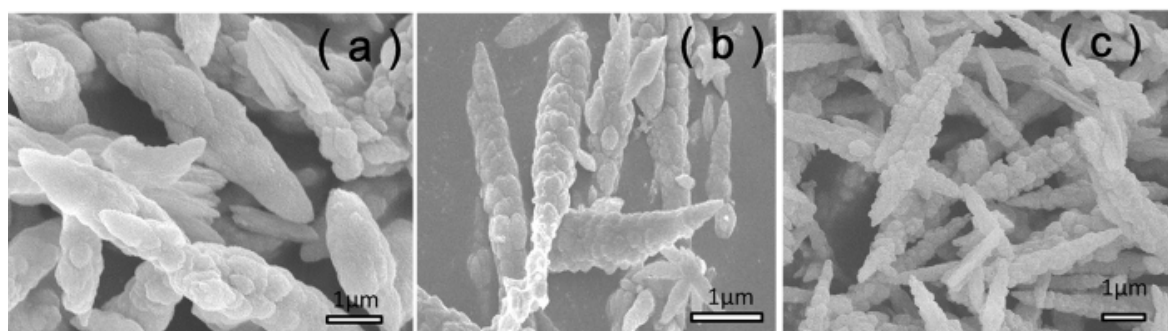

Figure s1 SEM images of the unusual  $\text{CaCO}_3$  crystals obtained at different reaction times: panels (a), (b), and (c) show the crystals sampled at the aging times of 5, 10 and 20 min, respectively.

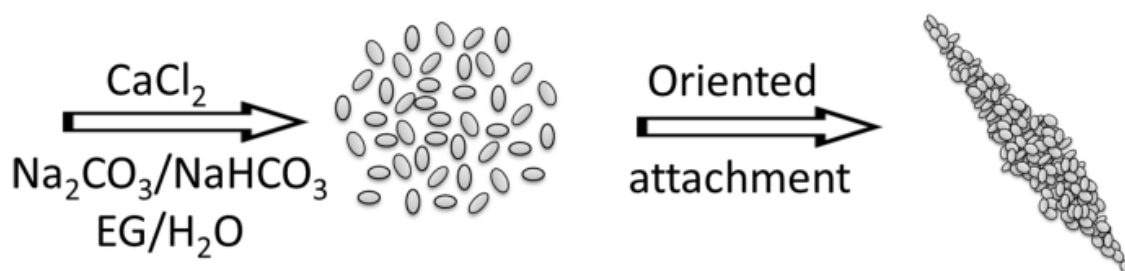

Figure s2 Schematic illustration of a formation process for the spica-like hierarchical  $\text{CaCO}_3$ .

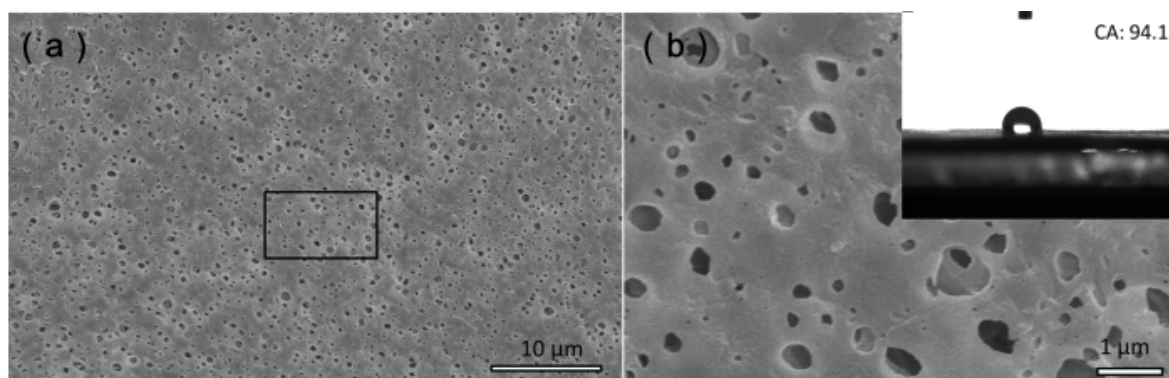

Figure s3 (a) Virgin pvdf membrane has pore morphology, (b) high-magnification view of the black box in (a). Inset in (b) indicates water contact angles of the virgin pvdf membrane.
